# Supplementary material for: Strigolactones positively regulate defense against root-knot nematodes in tomato
Source: PubMed Central journal article supplement (PMC6382333; doi:10.1093/jxb/ery439), 2018-12-21
Supplement: ery439_suppl_supplementary_tables_s1-s4.pdf [file ery439_suppl_supplementary_tables_s1-s4.pdf]

**Supplemental Table 1. PCR primers and restriction sites for VIGS vectors construction.**

| <b>Gene</b> | <b>Restriction sites</b> | <b>Forward primer</b>              | <b>Reverse primer</b>               |
|-------------|--------------------------|------------------------------------|-------------------------------------|
| <i>CCD7</i> | EcoRI BamHI              | 5'-CGgaattcCTAAAACAAAAGCCAAAATG-3' | 5'-GCg gatccATCCCAATAGGCAGTAAC-3'   |
| <i>CCD8</i> | EcoRI BamHI              | 5'-CGgaattcTCTTCACATCTATGGCTTCT-3' | 5'-GCg gatccATCTGGTGGTGGAACTATTA-3' |
| <i>MAX1</i> | EcoRI BamHI              | 5'-CGgaattcGATTTGATCTCCTCCTTC-3'   | 5'-GCg gatccGCATCAGCAACAATAACT-3'   |
| <i>PI-1</i> | EcoRI BamHI              | 5'-CGgaattcGGAAAATCCATCCATAAC-3'   | 5'-GCg gatccTGAACATACATGAACCCT-3'   |
| <i>PI-2</i> | EcoRI BamHI              | 5'-CGgaattcGTGGTCATCTTGGGTTTG-3'   | 5'-GCg gatccCCAGTGGGATAAATAAACG-3'  |
| <i>MYC2</i> | XbaI BamHI               | 5'-CGtctagaTGCTGCTGTGGTTGGT-3'     | 5'-GCg gatccTCCGATGCTCCTGCTC-3'     |

**Supplemental Table 2. Parameters used for detection of phytohormones and related compounds by HPLC-MS/MS.**

| <b>Compound</b>          | <b>Capillary<br/>CID<sup>1</sup><br/>(V)</b> | <b>Molecular<br/>ion [M-H]<br/>(m/z)</b> | <b>Fragment<br/>ion<br/>(m/z)</b> | <b>CE<sup>2</sup><br/>(V)</b> | <b>Reference</b>                |
|--------------------------|----------------------------------------------|------------------------------------------|-----------------------------------|-------------------------------|---------------------------------|
| JA                       | 50                                           | 209.1                                    | 59.1                              | 2                             | Wu <i>et al.</i> (2007)         |
| D <sub>5</sub> -JA (IS)  | 116                                          | 214.3                                    | 62.1                              | 8                             | Alba <i>et al.</i> (2015)       |
| ABA                      | 75                                           | 263.1                                    | 153                               | 0                             | Durgbanshi <i>et al.</i> (2005) |
| D <sub>6</sub> -ABA (IS) | 162                                          | 269.3                                    | 159.2                             | 0                             | Durgbanshi <i>et al.</i> (2005) |

<sup>1</sup>collision-induced dissociation; <sup>2</sup>collision energy; IS, internal standard.

**Supplemental Table 3. Primers used for qRT-PCR assays.**

| <b>Gene</b>  | <b>Accession numbers</b> | <b>Forward primer</b>        | <b>Reverse primer</b>        |
|--------------|--------------------------|------------------------------|------------------------------|
| <i>Actin</i> | Solyc03g078400           | 5'-TGGTCGGAATGGGACAGAAG-3'   | 5'-CTCAGTCAGGAGAACAGGGT-3'   |
| <i>CCD7</i>  | Solyc01g090660           | 5'-AGCAGATTTTCCAGCGATGAA-3'  | 5'-AAAGGAAAATGGGGTAGCGC-3'   |
| <i>CCD8</i>  | Solyc08g066650           | 5'-CCTTCAACGGCAAGGATGTC-3'   | 5'-AAGGCCTCTTAGCACCACAA-3'   |
| <i>MAX1</i>  | Solyc08g062950           | 5'-GGTGTTACATTGTCTCGCCC-3'   | 5'-CTCCAAGAGCCAACCAAACC-3'   |
| <i>MYC2</i>  | Solyc08g076930           | 5'-TAGCCACACTGGAGGCAAGATT-3' | 5'-CTAGGTCTAATTCCATGAGCGC-3' |
| <i>PDF</i>   | Solyc07g006380           | 5'-GCAAAGCACCAAGCCAAAC-3'    | 5'-GCATAGACACTTCCTTTGG-3'    |
| <i>PI-1</i>  | Solyc09g084470           | 5'-GAAACTCTCATGGCACGAA-3'    | 5'-CCTTCGCACATCAAGTTAGAG-3'  |
| <i>PI-2</i>  | Solyc03g020060           | 5'-CCTATTCAAGATGTCCCGTTC-3'  | 5'-GGGCAATCCAGAAGATGG-3'     |

The genes are identified from the Sol Genomics Network (<http://solgenomics.net/>)

**Supplemental Table 4. Plant phenotype of gene silenced plants**

| Genotype          | Plant height (cm) | Leaf number per plant | Shoot fresh weight (g/plant) | Root fresh weight (g/plant) |
|-------------------|-------------------|-----------------------|------------------------------|-----------------------------|
| pTRV              | 31.5              | 10.5                  | 18.86                        | 1.78                        |
| pTRV- <i>CCD7</i> | 22.1              | 9.8                   | 19.96                        | 2.66                        |
| pTRV- <i>CCD8</i> | 19.6              | 9.3                   | 19.11                        | 2.71                        |
| pTRV- <i>MAX1</i> | 22.3              | 10.0                  | 20.78                        | 3.13                        |

\*Growth parameters were determined 48d after sowing. Data are the average of 6 plants.
